# Supplementary material for: Comparative Genomic Analysis of Hypervirulent Group B streptococcus of ST12/Serotype Ib Suggests Potential Virulence Factors
Source: Research Square preprint supplement (doi:10.21203/rs.3.rs-6853157/v1), 2025-07-23
Supplement: Supplementary file 1 [file 5520e10c16a6549e7465a86e.xlsx]

## Sheet: Sheet1
Isolate	Sequence Type (ST)	Serotype	Year	Isolation Source	Log LD50	Genome Accession
Sag37	12	Ib	2014	blood	3.25042	CP019978
Sag-HS20-056	12	Ib	2020	blood	3.48144	JBNOYJ000000000
Sag150	12	Ib	2017	midstream urine	4.49969	JBNOYK000000000
Sag93	12	Ib	2017	midstream urine	4.73878	JBNOYL000000000
Sag-G036	12	III	2020	vaginal fluid	4.73878	JBNOYM000000000
Sag214	12	Ib	2017	midstream urine	5.49969	JBNOYN000000000
Sag-ZDN10	12	Ib	2016	midstream urine	5.72997	JBNOYO000000000
Sag-B2	12	Ib	2017	midstream urine	5.7679	JBNOYP000000000
Sag-G167	12	Ib	2020	vaginal fluid	5.7679	JBNOYQ000000000
Sag-HS19-101	12	Ib	2019	blood	6.22531	JBNOYR000000000
Sag-HS20-045	12	Ib	2020	midstream urine	6.22531	JBNOYS000000000
Sag-HS20-068	12	Ib	2020	midstream urine	6.22531	JBNOYT000000000
Sag-HS21-250	12	Ib	2021	midstream urine	6.22531	JBNOYU000000000
Sag-ZDN28	12	Ib	2017	midstream urine	6.26007	JBNOYV000000000
Sag-HS19-252	12	Ib	2019	blood	6.26951	JBNOYW000000000
Sag167	12	Ib	2017	midstream urine	6.58092	JBNOYX000000000
Sag-G056	12	V	2020	vaginal fluid	6.76492	JBNOYY000000000
Sag-B3	12	Ib	2017	midstream urine	6.89265	JBNOYZ000000000
Sag-HS19-160	12	Ib	2019	midstream urine	7.29003	JBNOZA000000000
Sag-HS19-175	12	Ib	2019	skin	7.29003	JBNOZB000000000
Sag-HS21-286	12	Ib	2021	blood	7.29003	JBNOZC000000000
Sag-ZDN07	12	Ib	2020	midstream urine	7.89432	JBNOZD000000000
Sag105	12	Ib	2017	midstream urine	＞8	CP191190
Sag149	12	Ib	2017	midstream urine	＞8	CP191191
Sag153	12	Ib	2017	midstream urine	＞8	CP036376
Sag28	12	Ib	2017	midstream urine	＞8	CP191192
Sag56	12	Ib	2017	midstream urine	＞8	CP191193
Sag58	12	Ib	2017	midstream urine	＞8	CP191194
Sag-G044	12	V	2020	vaginal fluid	＞8	CP191195
Sag-G052	12	V	2020	vaginal fluid	＞8	CP191196
Sag-HS21-263	12	Ib	2021	BALF	＞8	CP191197
Sag-ZDN16	12	Ib	2017	midstream urine	＞8	CP191198
Sag-ZDN19	12	Ib	2017	midstream urine	＞8	CP191199
