# Supplementary material for: Comparative Genomic Analysis of Hypervirulent Group B streptococcus of ST12/Serotype Ib Suggests Potential Virulence Factors
Source: Research Square preprint supplement (doi:10.21203/rs.3.rs-6853157/v1), 2025-07-23
Supplement: Supplementary file 2 [file e2dd59225773d82f291eb91c.docx]

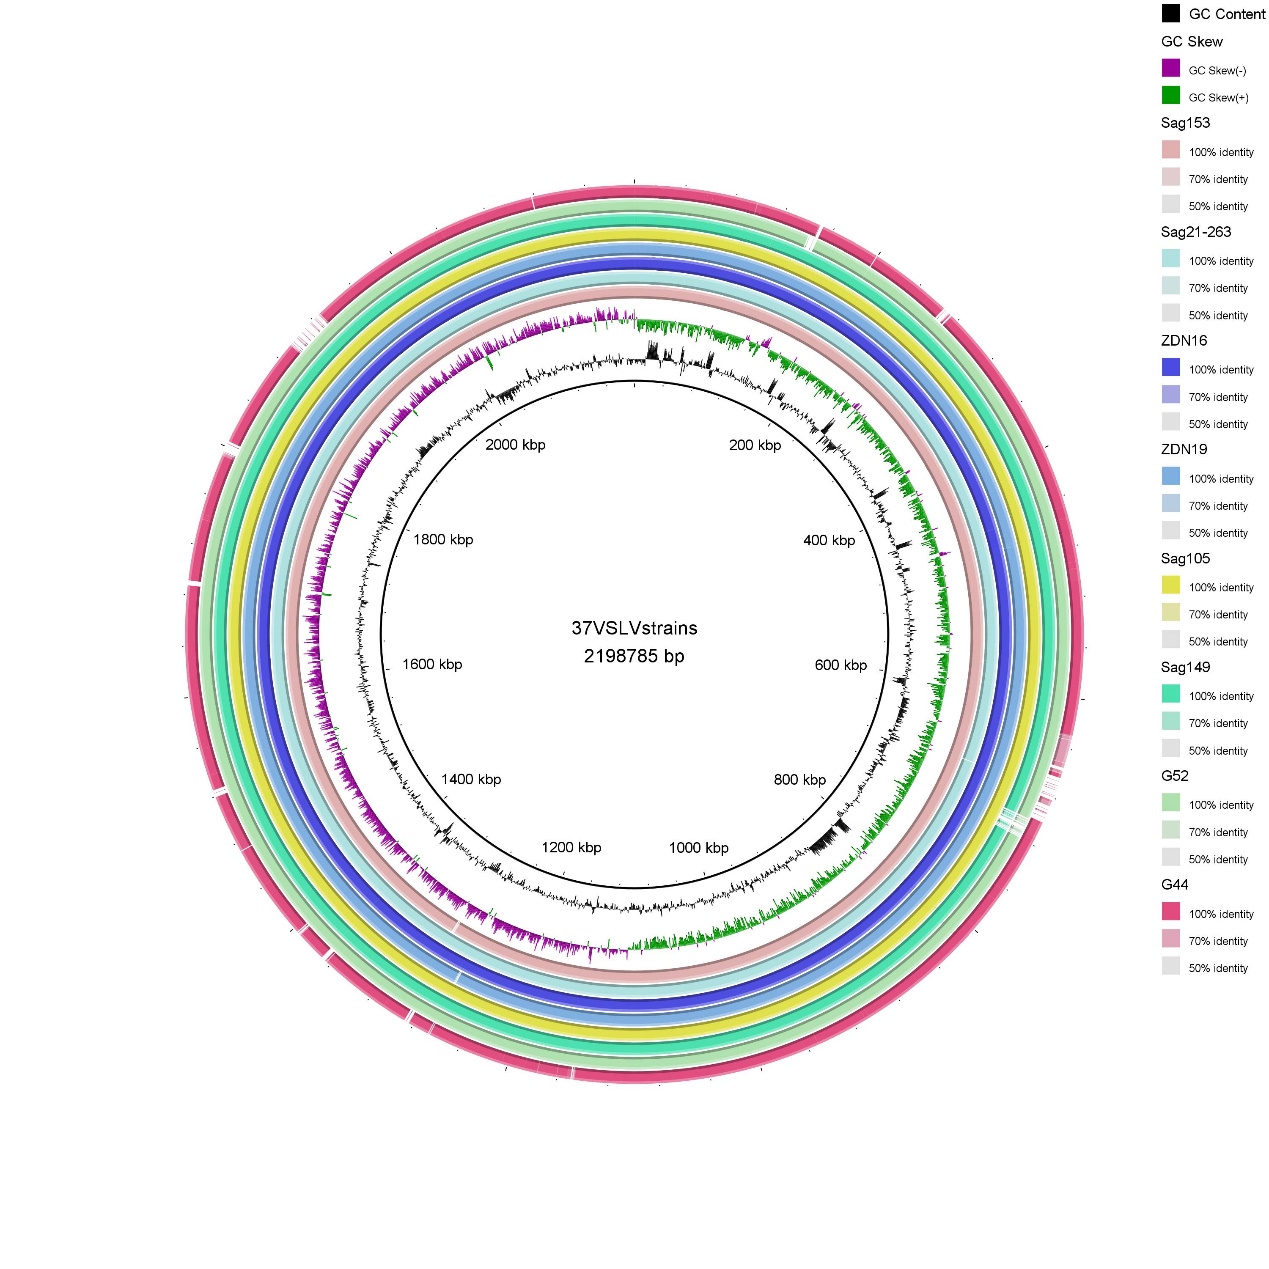


**S-F1** Genome comparisons of hypervirulent *S. agalactiae* strain Sag37 against strains of low virulence.
